# Supplementary material for: Best Practice Forever? Dynamics behind the Perception of Farm-Fed Anaerobic Digestion Plants in Rural Peripheries
Source: MDPI journal article supplement (doi:10.3390/en15072533), 2022-03-30
Supplement: s1 [file s1]

**Supplementary Material to the paper accepted for publication in Energies on 29<sup>th</sup> March 2022:  
Martinát, et al. (2022) Best Practice Forever? Dynamics behind the Perception of Farm-Fed  
Anaerobic Digestion Plants in Rural Peripheries.**

**Questionnaire used to collect data the surveys conducted.**

Part one

1. There is an anaerobic digestion (biogas) plant operated in your village. Could you, please, turn back in time before its construction and affirm whether you personally agreed with the construction of anaerobic digestion (biogas) plant or not?

- strongly agreed
- rather agreed
- neither
- rather disagreed
- strongly disagreed

2. If we turn back time again and you had possibility to decide about planned anaerobic digestion (biogas) plant in your community again, would you agree with the plan to build it?

- certainly yes
- rather yes
- neither
- rather no
- certainly no

3. Do you agree with the statement that local people were sufficiently informed about the intention to build anaerobic digestion (biogas) plant at the time of the decision-making?

- strongly agree
- rather agree
- neither
- rather disagree
- strongly disagree

4. Do you agree with statement that the information about the planned anaerobic digestion (biogas) plant was relevant, impartial and described the plan realistically?

- strongly agree
- rather agree
- neither
- rather disagree
- strongly disagree

5. Do you consider opportunities for participation in the anaerobic digestion (biogas) plant planning as sufficient?

- strongly agree
- rather agree
- neither
- rather disagree

- strongly disagree

6. Have you had a chance to participate in the planning process in any way?

- yes
- no

If yes, please, indicate your participation:

6a. an excursion organized for the residents to visit AD plant in other community

- yes
- no

6b. a public hearing organized by local council or investor of the anaerobic digestion (biogas) plant project

- yes
- no

6c. the documentation of the AD plant project was freely available for study in local administration office

- yes
- no

6d. a public opinion poll organized to find out the attitudes of local population towards the anaerobic digestion (biogas) plant project

- yes
- no

6e. the discussion with independent expert

- yes
- no

7. Do you agree with the statement that the operator of anaerobic digestion (biogas) plant in your community takes seriously objections of local people towards anaerobic digestion (biogas) plant and deals with it?

- strongly agree
- rather agree
- neither
- rather disagree
- strongly disagree

8. Do you agree with the statements that the operator of anaerobic digestion (biogas) plant in your community is competent and aware how to safely operate his anaerobic digestion (biogas) plant?

- strongly agree
- rather agree
- neither
- rather disagree
- strongly disagree

## Part two

### A. Gender

- Female
- Male

### B. Age

- ..... years

### C. Level of education

- primary
- secondary
- secondary with leaving exam
- tertiary (university)

### D. Economic status

- businessperson
- employee
- parental leave
- retiree
- student
- unemployed
